# Supplementary material
Source: Research Square preprint supplement (doi:10.21203/rs.3.rs-9618156/v1)

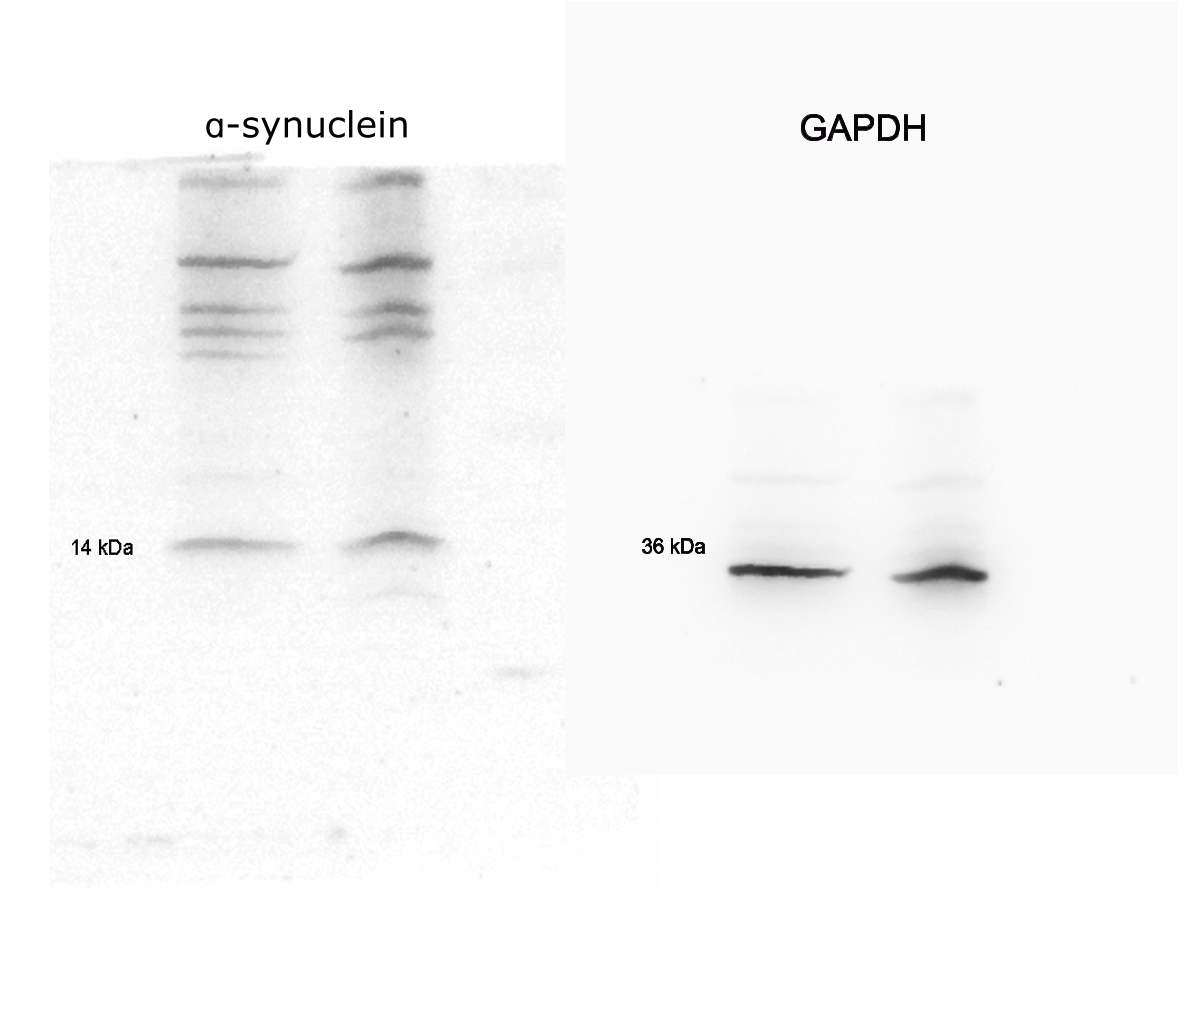
Fig 1C

Fig 3F


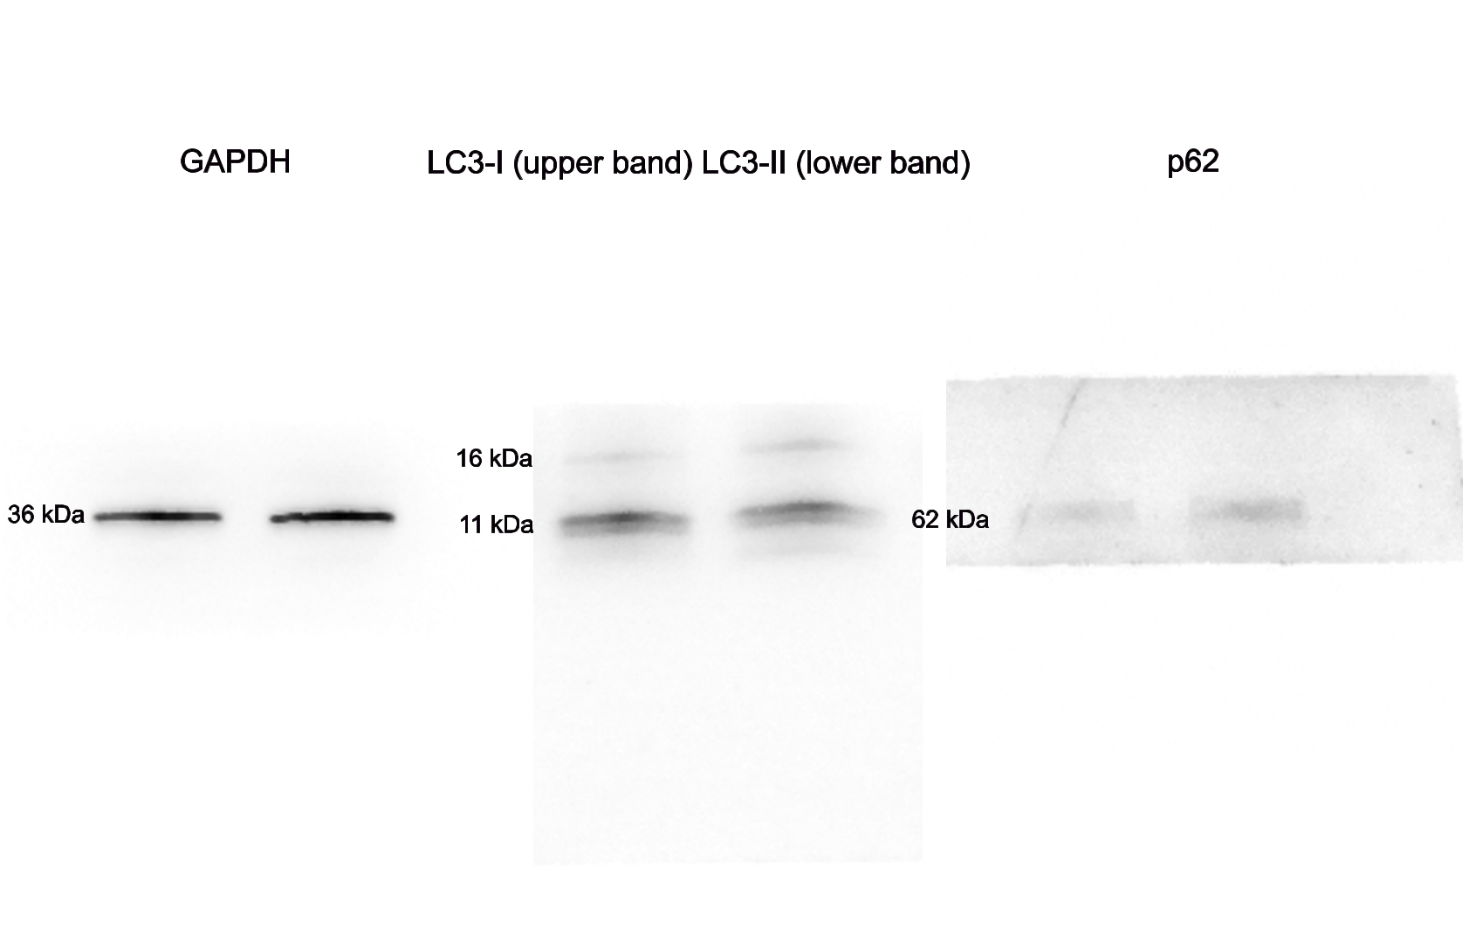


Fig 4A


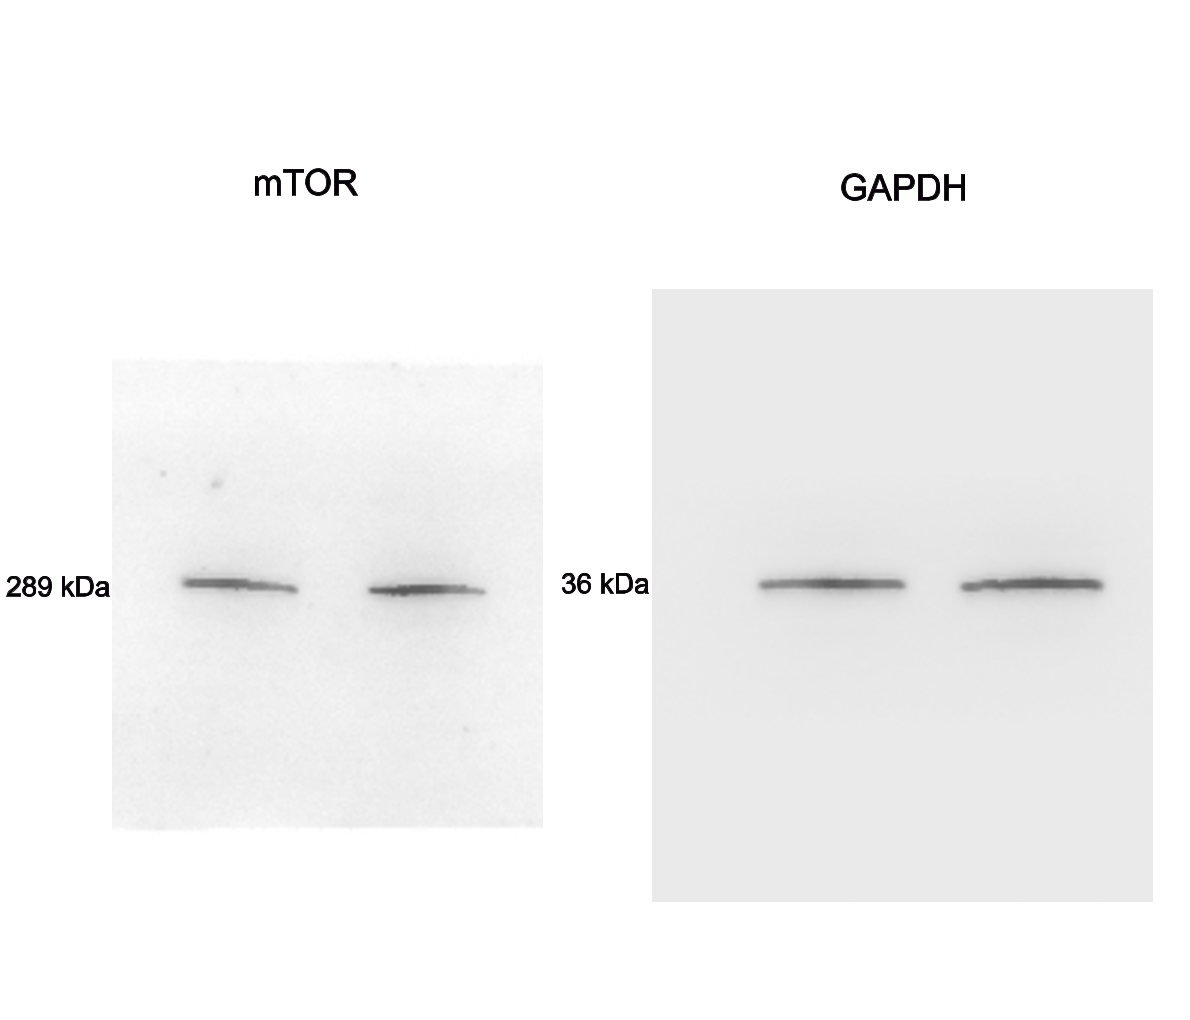

Supplement: Supplementary file 1 [file 41d651af7d353ccf8133a4d9.docx]
